# Supplementary material for: Shigella flexneri Regulator SlyA Controls Bacterial Acid Resistance by Directly Activating the Glutamate Decarboxylation System
Source: Front Microbiol. 2018 Aug 31;9:2071. doi: 10.3389/fmicb.2018.02071 (PMC6128205; doi:10.3389/fmicb.2018.02071)
Supplement: TABLE S1 — All strains and primers used in this study. [file Table_1.XLSX]

## Sheet: Primers
Primer Name	Purpose	Sequence (5' to 3')
SLYAUF	slyA deletion mutant	CATACTAGTGCTTCGTTATTGGCTTTTG
SLYAUR	slyA deletion mutant	TTCAGGCGATGGTCTATC
SLYADF	slyA deletion mutant	ATAGACCATCGCCTGAACGCAAAACTTGAGCATAA
SLYADR	slyA deletion mutant	CATGGATCCCGGTAAAAATCGGTCATTCCGC
GadAF-qRTPCR	qRT-PCR	GCATAAATTCGCCCGCTAC
GadAR-qRTPCR	qRT-PCR	CGTCACAGGCTTCAATCATG
PgadA_1000bp-F	For β-galactosidase assays	CCCACGCATCAAGCTGCGGCCGCCACCATTTCATGCGCTCATTGC
PgadA_1000bp-R	For β-galactosidase assays	TTTGCGCACTGACAAAAGCTTTTCGAACTCCTTAAATTTATTTG
PgadA-F	For EMSA	CAGTCTGAACGGGGTGTACA
PgadA-R	For EMSA	CTGAGCGGAAATCCGTTAAC

## Sheet: Strains
Strain	Description
wild-type (WT)	Shigella flexneri serotype 2a 2457T
∆slyA	slyA deletion mutant
∆slyA+pSlyA	∆slyA complemented with a SlyA-expressing plasmid
∆slyA+pGadA	∆slyA complemented with a GadA-expressing plasmid
WT+pNN387-PgadA	WT complemented with pNN387 containing a lacZ transcriptional fusion to the upstream region of the gadA gene
∆slyA+pNN387-PgadA	∆slyA complemented with pNN387 containing a lacZ transcriptional fusion to the upstream region of the gadA gene
